# Supplementary material for: Carbon materials derived from polymerization of bio-oil as a catalyst for the reduction of nitrobenzene
Source: Royal Society of Chemistry journal article supplement (doi:10.1039/d1se00398d), 2021-01-01
Supplement: d1se00398d1.pdf [file d1se00398d1.pdf]

## Supporting information

### **Carbon material derived from polymerization of bio-oil as catalyst for reduction of nitrobenzene**

Qing Xu<sup>a</sup>, Guoming Gao<sup>a</sup>, Hongli Tian<sup>a</sup>, Zhiran Gao<sup>a</sup>, Shu Zhang<sup>b</sup>, Leilei Xu<sup>c</sup>, Xun  
Hu<sup>a,\*</sup>

<sup>a</sup>School of Material Science and Engineering, University of Jinan, Jinan, 250022, P. R. China.

<sup>b</sup>Joint International Research Laboratory of Biomass Energy and Materials, Co-Innovation Center of Efficient Processing and Utilization of Forest Resources, College of Materials Science and Engineering, Nanjing Forestry University, Nanjing 210037, P. R. China.

<sup>c</sup>Collaborative Innovation Center of the Atmospheric Environment and Equipment Technology, School of Environmental Science and Engineering, Nanjing University of Information Science & Technology, Jiangsu Key Laboratory of Atmospheric Environment Monitoring and Pollution Control, 210044, Nanjing, P. R. China.

\*Corresponding author. Tel. /fax: +86–531–89736201; E-mail: [Xun.Hu@outlook.com](mailto:Xun.Hu@outlook.com).

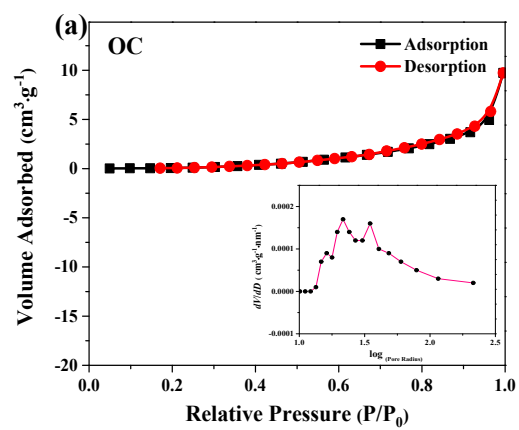

**Figure S1** The adsorption-desorption isotherm and pore radius distribution of catalysts produced from the polymerization of bio-oil and furfural with  $\text{HNO}_3$  oxidation.
